# Supplementary material
Source: PubMed Central journal article supplement (PMC5497753)
Supplement: NIHMS865556-supplement.pdf [file NIHMS865556-supplement.pdf]

Figure S1

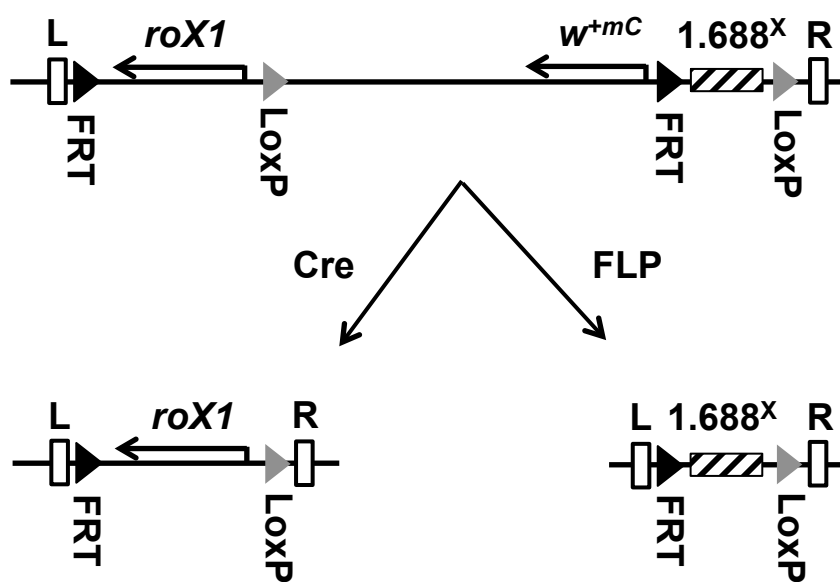

Figure S2

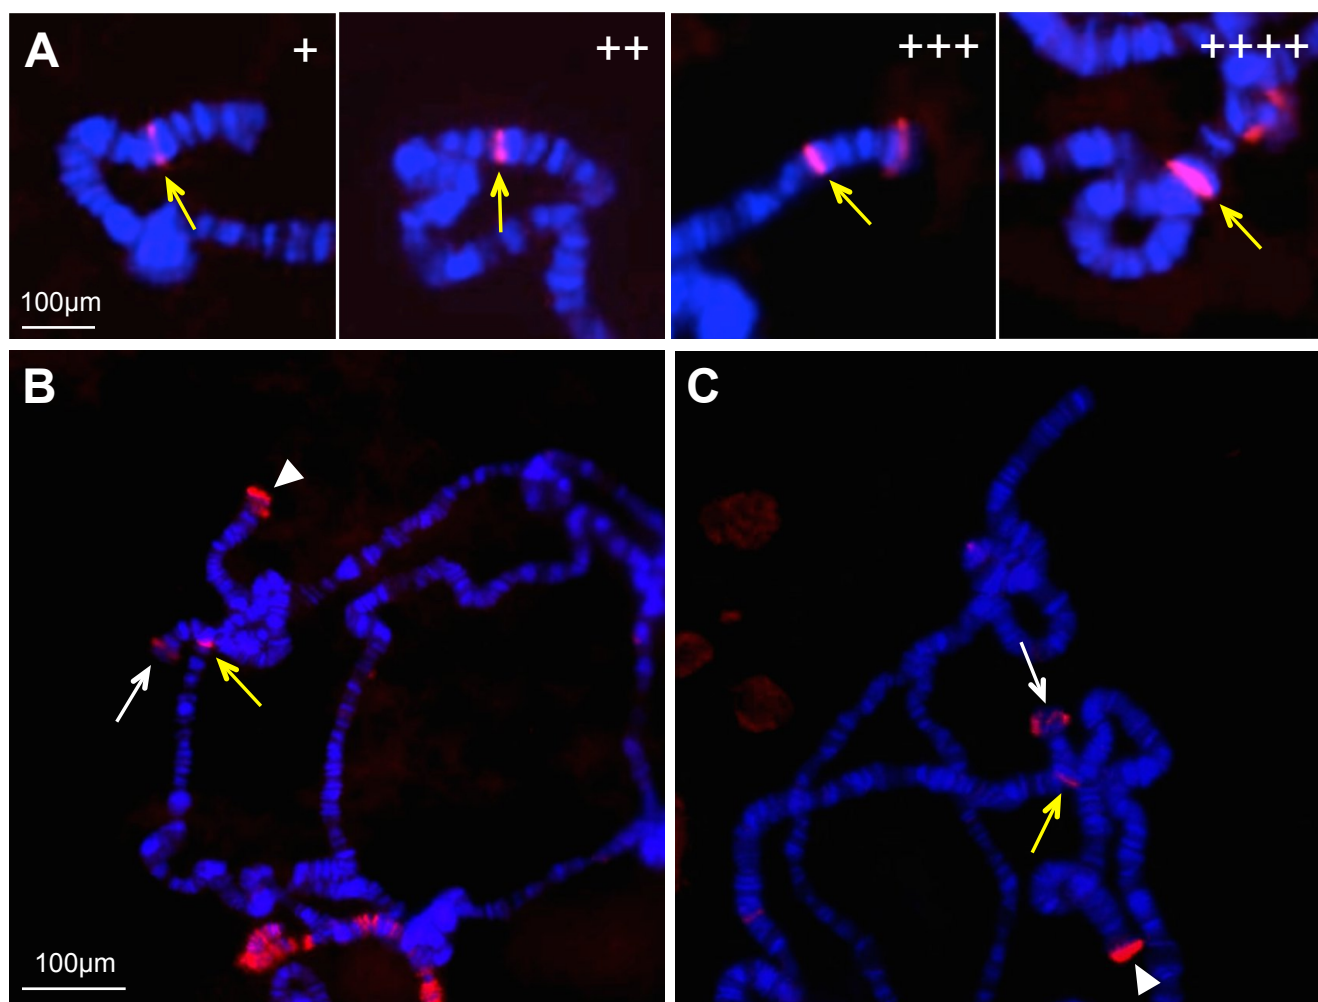

Figure S3

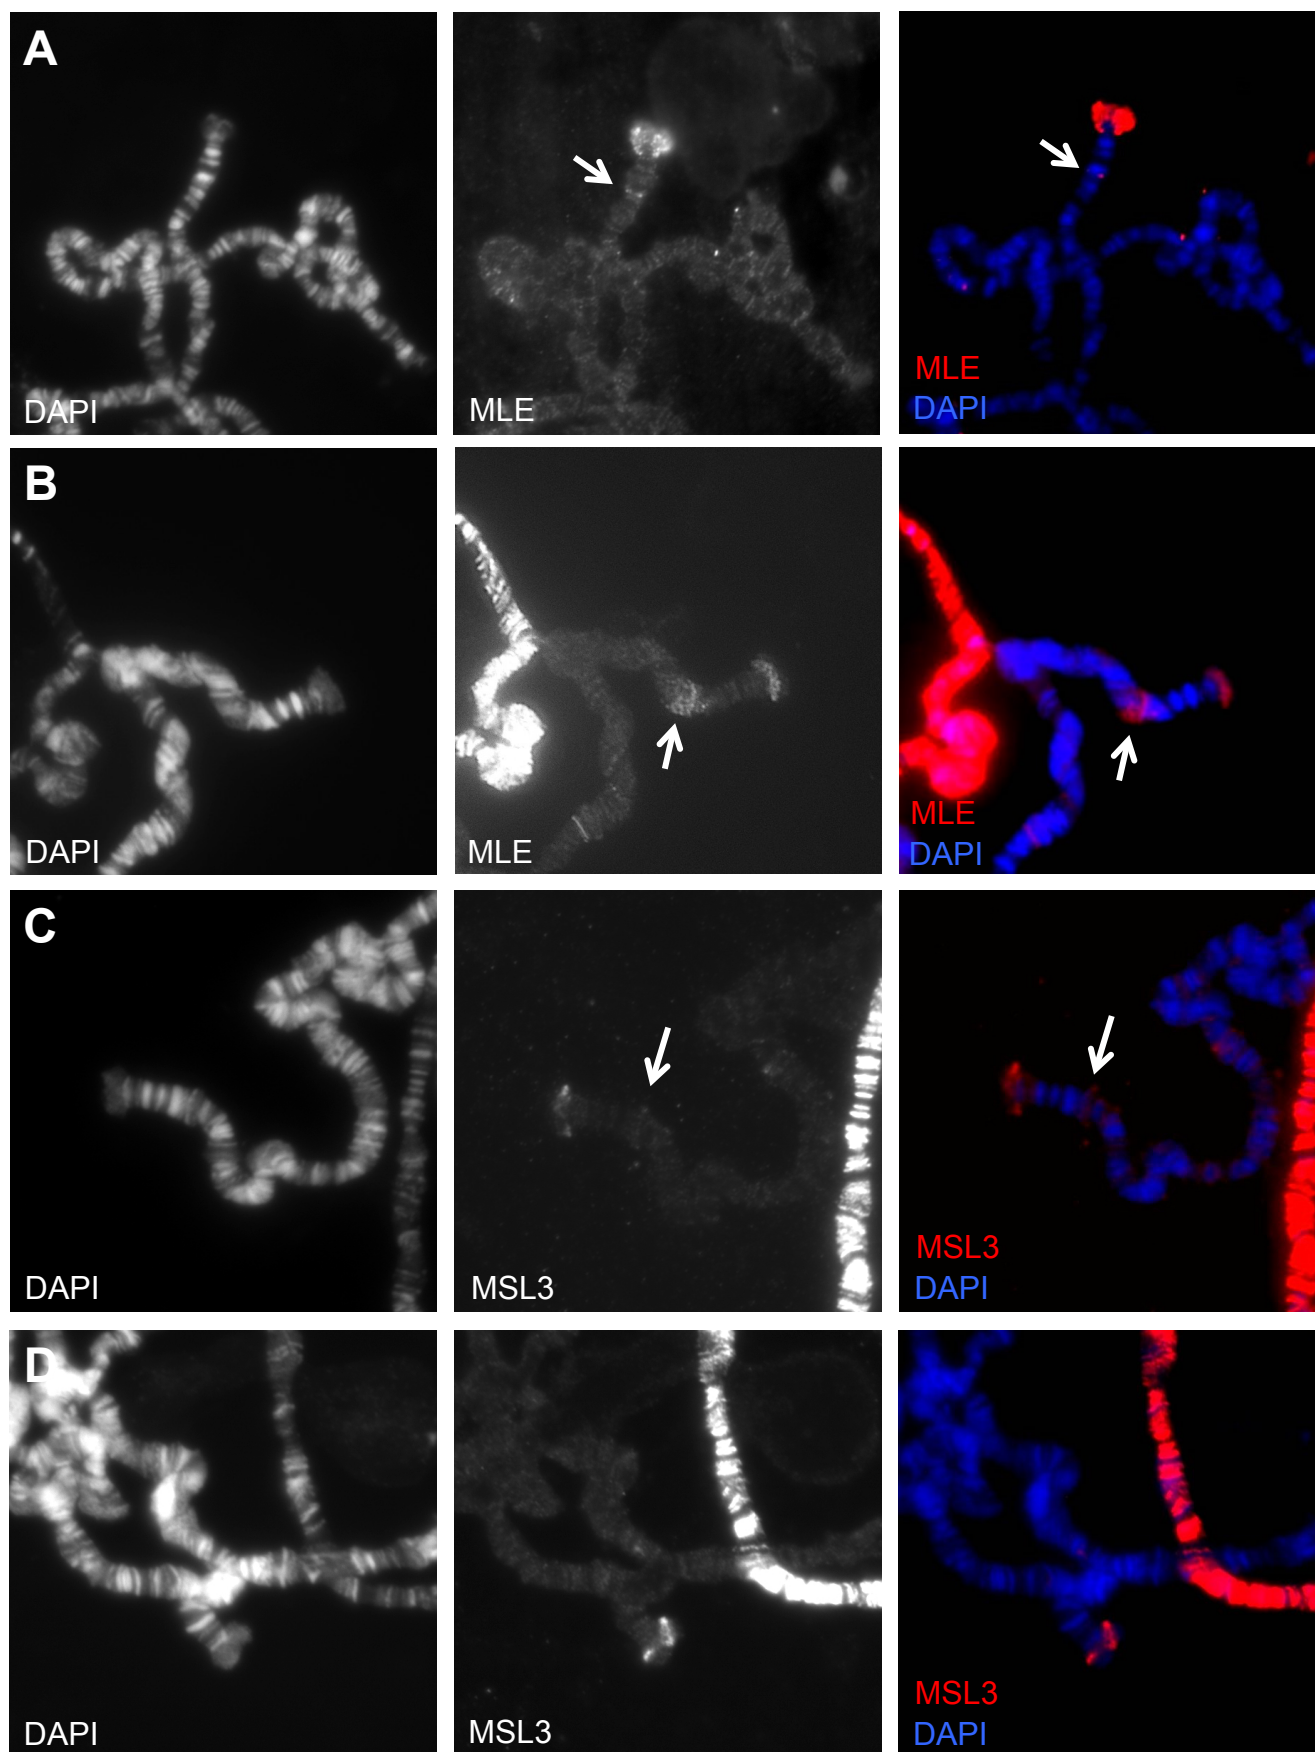

Figure S4

```

1.6883F      1  TTAATGATGGTACCCCTTATCAAAAATGCGAAAATTG-TTAAAATTTTTT-TTTTGTATA
1.6881A      1  TTAATGATGGTACCCCTTATCAAAAATGCGAAAATGTG-TTAAAATTTTTTGTTTTTGATT
1.6883C      1  TTCAATGATGTACCCCTTACAAAAATGCGAAAATTGACCCGAAAATTAA-TTTCCTAA
CES          1  CGAAT-----
consensus    1  ...**.....

1.6883F      60  ATAATAAAAAATAGTGATAGGGATAGTTAGCTATGTTTATTGGCAGTA-TAAAACAGTCTTC
1.6881A      60  ATAATAAAAAATAGTGACACTGATAGTTAGCTATGTTTATTGGCAGTACAAAACAGTCTTT
1.6883C      61  ATCCTTCCAAAGAGTGATAGGGATCGTTAGCACGTCTAAATAGCTGCTCAAAACAGTATT
CES          6  -----A-TG-----
consensus    61  .....*.*.....

1.6883F      120  ATTTAAGCGGTAATATATTT-TTTTACCAAGTTATGGAAAAAACCCCGTTTGTAATATC
1.6881A      120  ATTTAAGCGGTATAACTTT-TTTCGCCAGTTATGGACAAAACCCCGTTTGTAATATC
1.6883C      121  CTTTCATCTATATGACATTTTTTTAGCGATGTTATGGCGAAAATACCGTTAGTAAA-ATC
CES          9  -----AGC-----
consensus    121  .....*.*.....

1.6883F      179  AACTTTTTGGCAATTCATATTTTGTATTATTGGTTA-AAAAGAATCAGTATTTTCTCA
1.6881A      179  CGATTTTTTGCAT-TTTTATTTTGTATTATTGGTTA-AAAAGAATCTGTATTTTCTCA
1.6883C      180  ACGTTTTTGA CAAAACCCGTTTTCCAAAAATTCGGTCA-TAAAAAATCCGTTTTTTCGGC
CES          12  -----
consensus    181  .....

1.6883F      238  ATAGCATAAAAAATAATTGTCCAAAAGTGAAATGCCATACCTCGTTGAATTCGTAACAAA
1.6881A      236  ATAGCATTA AAAAATAACGGTCCAAAGAGCGAAATGCCATACCTCGTTGAATTCGTAACA GA
1.6883C      240  ACAACTTTAAAAAATAAATGCCCTGAATATGGAATGTCATACCGCGTTGAGCTCGTAATAAA
CES          12  -----GAGA-----
consensus    241  .....*.*.....

1.6883F      298  ATTTCCATATCGACCTGTATTCAGAAATGGAAAGTCAAATTTTTTGCATTTTTTCGCAAAAT
1.6881A      296  ATTTCCCATATCGACCTGCATTTAGAAATGGAAATTCAGATTTTTTGCATTTTTTCGCAAAAT
1.6883C      300  ATTTCCCAATCCAACTGTATCCCGAATTGGGAATTCATTTTTTATCCATTTTTTCGAAAAAT
CES          16  -----TG-----GAT
consensus    301  .....*.....**

1.6883F      358  T
1.6881A      356  T
1.6883C      360  T
CES          21  G
consensus    361  .

```

Figure S5

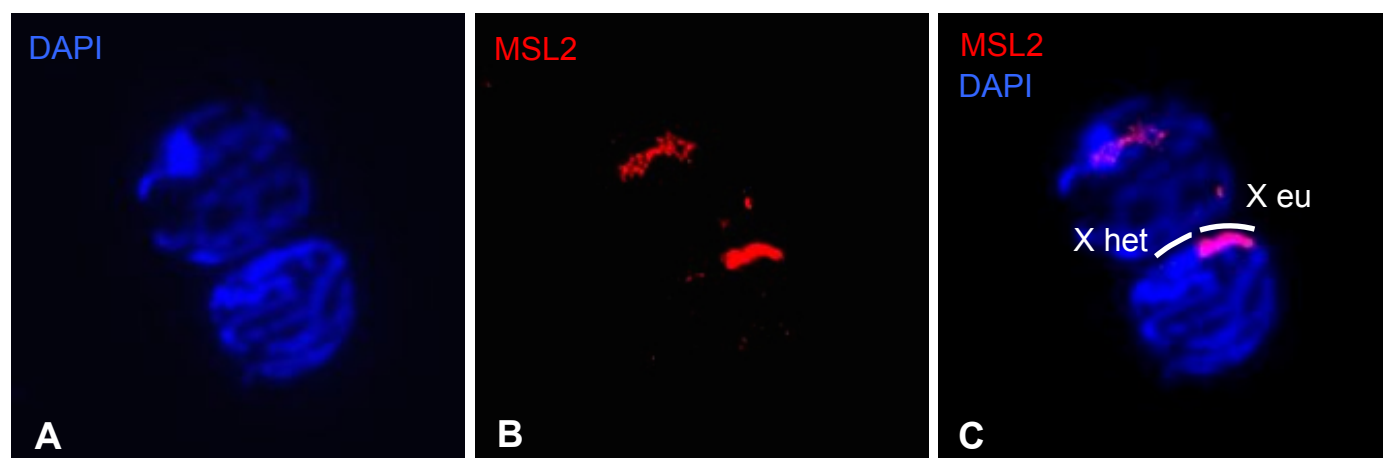

Figure S6

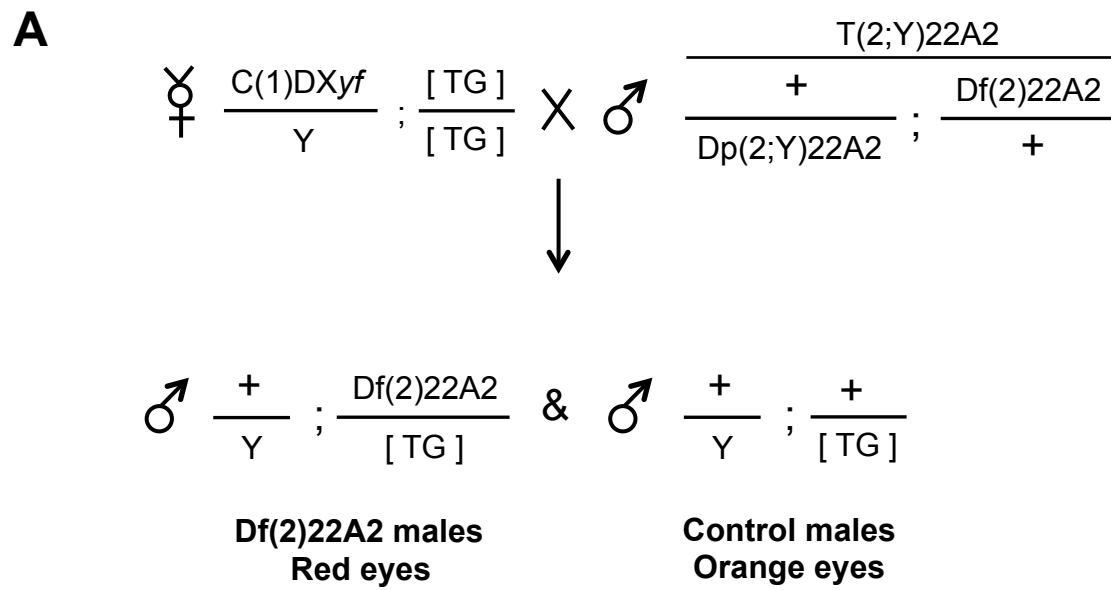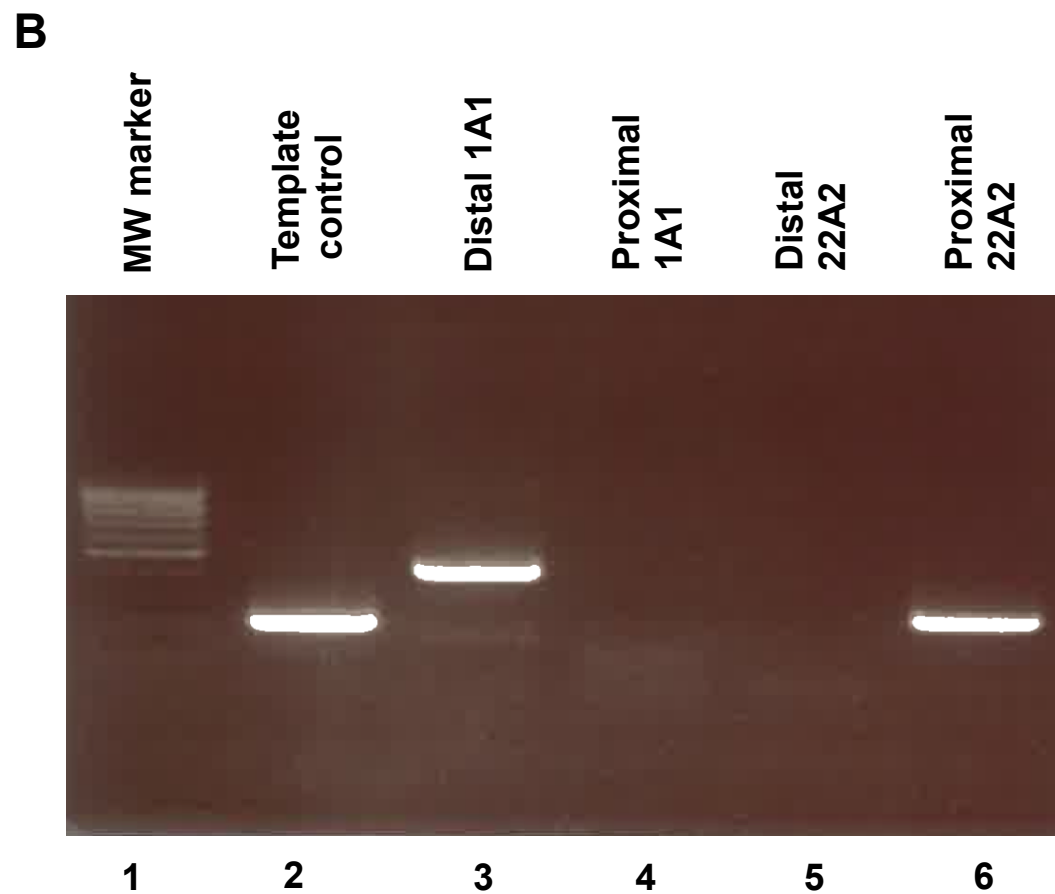

**Figure S7**

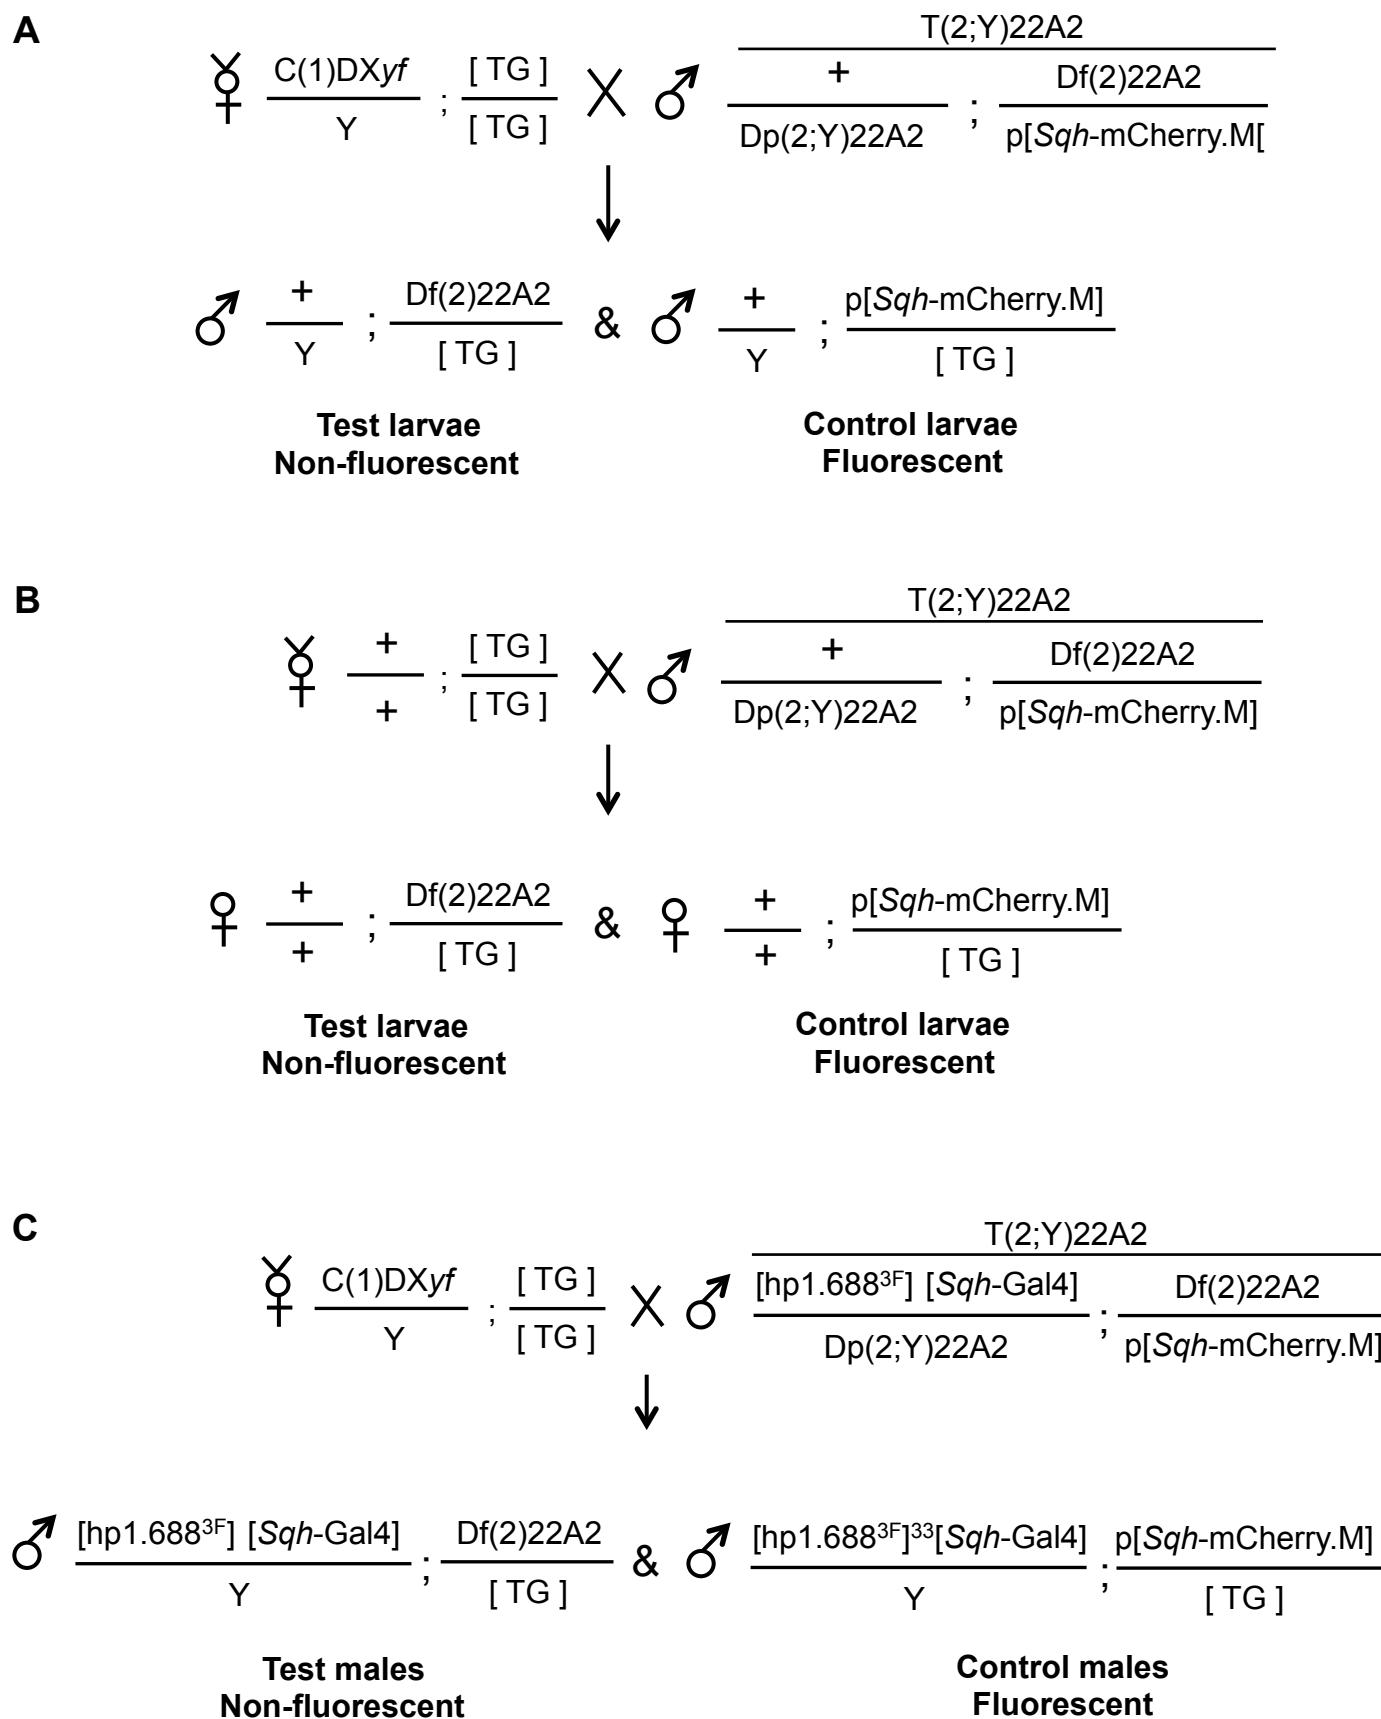

**Figure S1. Transgene insertions containing *roX1* and 1.688<sup>X</sup> repeats. Related to Figures 1-5.** Integrated transgenes are flanked by attR and attL sites (L, R). LoxP and FRT sites allow excision of *w*<sup>+mC</sup> and 1.688<sup>X</sup> upon Cre expression (left), or *w*<sup>+mC</sup> and *roX1* upon FLP expression (right).

**Figure S2. MSL2 recruitment by autosomal transgenes and spreading to the 3L telomere. Related to Figure 1 and Table 1.** (A) Representative images depicting scoring of MSL2 recruitment from weak (+) to very strong (++++). Scoring data is presented in Table 1. MSL2 recruitment by [1.688<sup>3F</sup>]<sup>22A3</sup> (B) and [*roX1*+1.688<sup>3F</sup>]<sup>22A3</sup> (C) detected by immunostaining of polytene preparations and visualized with Texas Red. Recruitment near the integration site (yellow arrows), recruitment at telomere 2L (white arrows) and 3L (white arrowheads) is observed. DNA was counterstained with DAPI (blue).

**Figure S3. MSL3 and MLE are recruited by 1.688<sup>3F</sup> repeats. Related to Figure 1.** Polytene preparations from [1.688<sup>3F</sup>]<sup>22A3</sup> males were stained with antibodies to the non-core components of the MSL complex MSL3 and MLE. Both display minor binding near the 22A3 integration site (arrows), as well as spreading into subtelomeric regions of 2L.

**Figure S4. Sequence alignment detects no similarity between 1.688<sup>X</sup> repeats and CES. Related to Figures 4 and 5.** Multiple sequence alignment was performed using 1.688<sup>3F</sup>, 1.688<sup>1A</sup> and 1.688<sup>3C</sup> (superscript denotes cytological position). Alignment of a Chromatin Entry Site (CES) is also shown. Multiple sequence alignment was generated using T-Coffee [S1].

**Figure S5. MSL complex is limited to euchromatic X chromatin. Related to Figure 1.** Mitotic embryo nuclei were probed with antibodies to MSL2, detected by Texas Red. A little over half of the X is euchromatic (X eu) and binds MSL2. The remainder is heterochromatic (X het), largely composed of 359 bp repeats that are related to the euchromatic 1.688<sup>X</sup> repeat family. DNA is counterstained with DAPI.

**Figure S6. Matings to detect autosomal compensation in pharate pupae and adults. Related to Figure 4. (A)** Compound X/Y females homozygous for transgene integrations ([TG]) on 2L were mated to T(2;Y)22A2 males. T(2;Y)22A2 can be separated into Df(2)22A2 and Dp(2;Y)22A2 [S2]. All male progeny inherit a wild type maternal Y chromosome, the 2L [TG] and Df(2)22A2 (test males) or the wild type 2<sup>nd</sup> chromosome (control males). Df(2)22A2 carries a *w*<sup>+</sup> marker that confers dark red eye color. **(B)** PCR to detect the proximal and distal ends of the insertions used to generate T(2;Y)22A2. The translocation occurred between FRT sites at 22A2 (2L) and 1A1 of a duplication of X on the Y [S2]. Amplicons from a representative pharate male carrying Df(2)22A2 are shown. Only distal 1A1 (lane 3) and proximal 22A2 (lane 6) PCR products are present in Df(2)22A2. The proximal 1A1 (lane 4) and the distal 22A2 (lane 5) PCR products, indicative of Dp(2;Y)22A2, are not detected. A template control (lane 2) to an unrelated gene is also shown. Primer sequences are available upon request.

**Figure S7. Matings to detect autosomal compensation and the effect of 1.688<sup>3F</sup> siRNA on the recruitment of compensation. Related to Figures 4 and 5. (A)** Compound X/Y females with the transgene to be tested ([TG]) were mated to T(2;Y)22A2 / p[Sqh-mCherry.M] males to produce unmarked Df(2)22A2 male larvae. Control males are marked with p[Sqh-mCherry.M] on the intact 2<sup>nd</sup> chromosome. All male offspring inherit the maternal Y chromosome. Males are identified by gonad morphology. **(B)** Df(2)22A2 female larvae were produced by mating females homozygous for the transgene to T(2;Y)22A2 males carrying p[Sqh-mCherry.M] on the intact 2<sup>nd</sup> chromosome. All female progeny inherit one copy of the transgene and either Df(2)22A2 (test) or p[Sqh-mCherry.M] (control). Females are identified by gonad morphology. **(C)** Compound X/Y females homozygous for the transgene to be tested ([TG]) were mated to T(2;Y)22A2 males carrying [hp 1.688<sup>3F</sup>] [S3] and p[Sqh-GAL4] on the X chromosome. p[Sqh-mCherry.M] marks the intact 2<sup>nd</sup> chromosome. All male progeny produce ectopic 1.688<sup>3F</sup> siRNA and carry a wild type Y chromosome.

Table S1.

|                            | Gene     | Transgene |             |       |                     |       |                                  |       |
|----------------------------|----------|-----------|-------------|-------|---------------------|-------|----------------------------------|-------|
|                            |          | None      | <i>roX1</i> |       | 1.688 <sup>3F</sup> |       | <i>roX1</i> +1.688 <sup>3F</sup> |       |
| Test Genes on 2L           | CG33128  | 1         | 1.263       | 1.11  | 1.208               | 1.326 | 1.425                            | 1.337 |
|                            | RFeSP    | 1         | 1.192       | 1.242 | 1.368               | 1.29  | 1.63                             | 1.49  |
|                            | Eno      | 1         | 1.096       | 1.184 | 1.14                | 1.26  | 1.31                             | 1.51  |
|                            | CG16704  | 1         | 1.096       | 1.06  | 1.12                | 1.098 | 1.204                            | 1.133 |
|                            | eIF-3p40 | 1         | 0.998       | 1.1   | 1.09                | 1.25  | 1.37                             | 1.26  |
|                            | His3.3A  | 1         | 1.49        | 1.612 | 1.45                | 1.348 | 1.59                             | 1.474 |
|                            | Rpn11    | 1         | 0.862       | 0.824 | 0.96                | 0.935 | 0.99                             | 0.92  |
|                            | RpL37A   | 1         | 1.412       | 1.478 | 1.762               | 1.696 | 1.88                             | 2.069 |
|                            | Trip1    | 1         | 1.408       | 1.48  | 1.51                | 1.592 | 1.672                            | 1.761 |
|                            | CG31778  | 1         | 1.396       | 1.484 | 1.689               | 1.745 | 1.533                            | 1.594 |
| Control Genes on 2R and 3R | Xbp1     | 1         | 0.954       | 0.943 | 0.92                | 0.894 | 0.902                            | 0.88  |
|                            | DipB     | 1         | 0.844       | 0.876 | 1                   | 0.912 | 0.912                            | 0.993 |
|                            | ATPa     | 1         | 1.178       | 1.192 | 1.107               | 1.11  | 1.116                            | 1.143 |
|                            | Gprk2    | 1         | 1.115       | 1.084 | 1.098               | 1.12  | 1.108                            | 1.033 |
|                            | GAPDH    | 1         | 1.102       | 1.196 | 1.086               | 1.162 | 1.14                             | 1.092 |

**Table S1. Relative expression of control and test genes in males with *roX1* and 1.688<sup>3F</sup> transgenes. Related to Figures 2 and 3.** Gene expression was measured by quantitative RT-PCR. Expression in male larvae with integrations of [*roX1*], [1.688<sup>3F</sup>], or [*roX1*+1.688<sup>3F</sup>] on 2L was measured. A laboratory reference strain with no transgene (*yw*) was used as the calibrator, and *Dmn* was the normalizing gene. Two biological replicates are presented.

## SUPPLEMENTAL REFERENCES

- S1. Di Tommaso, P., Moretti, S., Xenarios, I., Orobitz, M., Montanyola, A., Chang, J.M., Taly, J.F., and Notredame, C. (2011). T-Coffee: a web server for the multiple sequence alignment of protein and RNA sequences using structural information and homology extension. *Nucleic Acids Res* 39, W13-17.
- S2. Joshi, S.S., Cheong, H., and Meller, V.H. (2014). A strategy for generation and balancing of autosomal Y chromosome translocations. *Fly (Austin)* 8, 58-62.
- S3. Menon, D.U., Coarfa, C., Xiao, W., Gunaratne, P.H., and Meller, V.H. (2014). siRNAs from an X-linked satellite repeat promote X-chromosome recognition in *Drosophila melanogaster*. *Proc Natl Acad Sci U S A* 111, 16460-16465.
